# Supplementary material for: Fixed airflow obstruction in asthma: a descriptive study of patient profiles and effect on treatment responses
Source: PubMed Central journal article supplement — J Asthma. 2014 Mar 19;51(6):603–9. doi: 10.3109/02770903.2014.895012 (PMC4162502; doi:10.3109/02770903.2014.895012), 2014-03-19
Supplement: JAS-51-603-s1.pdf [file JAS-51-603-s1.pdf]

## ONLINE SUPPLEMENT MATERIAL

### FVC OUTCOMES (LLN DEFINITION)

Changes from baseline in predose FVC were worse for FAO+ versus FAO- patients receiving placebo in both studies (Figure E2). In patients with mild to moderate asthma (study I), slight improvements from baseline in predose FVC were observed in both FAO+ and FAO- patients (using the LLN definition) who were assigned to placebo and received short-acting  $\beta$ -agonist (SABA) only during both the run-in and randomized treatment periods.

**TABLE E1.** – LLN Reference Equations<sup>a</sup>

| Race              | Sex    | LLN                                 |
|-------------------|--------|-------------------------------------|
| Caucasians        | Male   | $78.388 - 0.2066 \times \text{age}$ |
|                   | Female | $81.015 - 0.2125 \times \text{age}$ |
| African Americans | Male   | $78.822 - 0.1828 \times \text{age}$ |
|                   | Female | $80.978 - 0.2039 \times \text{age}$ |
| Mexican Americans | Male   | $80.925 - 0.2186 \times \text{age}$ |
|                   | Female | $83.044 - 0.2248 \times \text{age}$ |

LLN = lower limit of normal.

<sup>a</sup>Hankinson JL, Odencrantz JR, Fedan KB. Spirometric reference values from a sample of the general US population. *Am Rev Respir Crit Care Med* 1999; 159:179–187.

**TABLE E2.** – Overlap Between FAO Definitions

|                    | FEV <sub>1</sub> /FVC Criterion | <LLN<br>( <i>n</i> = 116) | ≥LLN<br>( <i>n</i> = 371) |
|--------------------|---------------------------------|---------------------------|---------------------------|
| Mild to moderate   | <0.70 ( <i>n</i> = 76)          | 70                        | 6                         |
|                    | ≥0.70 ( <i>n</i> = 411)         | 46                        | 365                       |
| Moderate to severe | <0.70 ( <i>n</i> = 184)         | 170                       | 14                        |
|                    | ≥0.70 ( <i>n</i> = 375)         | 56                        | 319                       |

FAO = fixed airflow obstruction; FEV<sub>1</sub> = forced expiratory volume in 1 second; FVC = forced vital capacity; LLN = lower limit of normal.

**TABLE E3.** – Study I (Mild-to-Moderate Asthma): Treatment Outcomes Based on FAO Category Using <0.70 Definition

| Outcome                                           | Adjusted Mean Change From Baseline |                                |                               |                                |                               |                                |                               |                                |
|---------------------------------------------------|------------------------------------|--------------------------------|-------------------------------|--------------------------------|-------------------------------|--------------------------------|-------------------------------|--------------------------------|
|                                                   | BUD/FM pMDI<br>160/9 µg            |                                | BUD pMDI<br>160 µg            |                                | FM DPI<br>9 µg                |                                | Placebo                       |                                |
|                                                   | FAO+<br>(n = 17) <sup>a</sup>      | FAO-<br>(n = 112) <sup>a</sup> | FAO+<br>(n = 20) <sup>a</sup> | FAO-<br>(n = 107) <sup>a</sup> | FAO+<br>(n = 16) <sup>a</sup> | FAO-<br>(n = 105) <sup>a</sup> | FAO+<br>(n = 24) <sup>a</sup> | FAO-<br>(n = 107) <sup>a</sup> |
| FEV <sub>1</sub> (L)                              | 0.391                              | 0.319                          | 0.22                          | 0.216                          | 0.005                         | 0.198                          | 0.087                         | 0.024                          |
| FVC (L)                                           | 0.346                              | 0.204                          | 0.201                         | 0.159                          | -0.0043                       | 0.145                          | 0.814                         | 0.044                          |
| Withdrawals due to asthma events <sup>b</sup> (%) | 0                                  | 8.9                            | 20                            | 3.7                            | 25                            | 20                             | 41.7                          | 31.8                           |
| Asthma control days (%)                           | 18.2                               | 22.1                           | 18.5                          | 21.1                           | 11.1                          | 12.1                           | 7.4                           | 6.4                            |
| Rescue medication use (inh/d)                     | -2.22                              | -1.71                          | -1.10                         | -1.38                          | -1.06                         | -1.38                          | 0.81                          | -0.36                          |
| Awakening-free nights (%)                         | 19.8                               | 22.0                           | 17.3                          | 21.3                           | 15.2                          | 19.2                           | 8.5                           | 14.0                           |

BUD = budesonide; DPI = dry powder inhaler; FAO = fixed airflow obstruction; FEV<sub>1</sub> = forced expiratory volume in 1 second; FM = formoterol; FVC = forced vital capacity; pMDI = pressurized metered-dose inhaler.

<sup>a</sup>Patient numbers varied slightly across variables.

<sup>b</sup>Based on predefined criteria (Table 1).

**TABLE E4.** – Study II (Moderate-to-Severe Asthma): Treatment Outcomes Based on FAO Category Using <0.70 Definition

| Outcome                                           | Adjusted Mean Change From Baseline |                               |                               |                               |                               |                               |                               |                               |
|---------------------------------------------------|------------------------------------|-------------------------------|-------------------------------|-------------------------------|-------------------------------|-------------------------------|-------------------------------|-------------------------------|
|                                                   | BUD/FM pMDI<br>320/9 µg            |                               | BUD pMDI<br>320 µg            |                               | FM DPI<br>9 µg                |                               | Placebo                       |                               |
|                                                   | FAO+<br>(n = 47) <sup>a</sup>      | FAO-<br>(n = 77) <sup>a</sup> | FAO+<br>(n = 32) <sup>a</sup> | FAO-<br>(n = 77) <sup>a</sup> | FAO+<br>(n = 38) <sup>a</sup> | FAO-<br>(n = 85) <sup>a</sup> | FAO+<br>(n = 39) <sup>a</sup> | FAO-<br>(n = 86) <sup>a</sup> |
| FEV <sub>1</sub> (L)                              | 0.191                              | 0.176                         | 0.011                         | 0.096                         | -0.159                        | -0.033                        | -0.181                        | -0.177                        |
| FVC (L)                                           | 0.172                              | 0.142                         | -0.020                        | 0.058                         | -0.142                        | -0.016                        | -0.193                        | -0.142                        |
| Withdrawals due to asthma events <sup>b</sup> (%) | 4.3                                | 14.3                          | 21.9                          | 19.5                          | 47.4                          | 30.6                          | 51.3                          | 48.8                          |
| Asthma control days (%)                           | 17.0                               | 18.6                          | 2.6                           | 8.2                           | 3.7                           | 5.8                           | 1.6                           | 0                             |
| Rescue medication use (inh/d)                     | -1.20                              | -1.07                         | -.017                         | -0.54                         | -0.31                         | -0.75                         | 0.62                          | 0.74                          |
| Awakening-free nights (%)                         | 14.5                               | 11.7                          | 16.7                          | 14.7                          | 12.7                          | 11.5                          | 9.5                           | 5.3                           |

BUD = budesonide; DPI = dry powder inhaler; FAO = fixed airflow obstruction; FEV<sub>1</sub> = forced expiratory volume in 1 second; FM = formoterol; FVC, forced vital capacity; pMDI = pressurized metered-dose inhaler.

<sup>a</sup>Patient numbers varied slightly across variables.

<sup>b</sup>Based on predefined criteria (Table 1).

**FIGURE E1.** Overlap in FAO definitions and influence of age between FAO definitions in study I (mild-to-moderate asthma) (**A**) and study II (moderate-to-severe asthma) (**B**). FAO = fixed airflow obstruction; LLN = lower limit of normal.

**A**

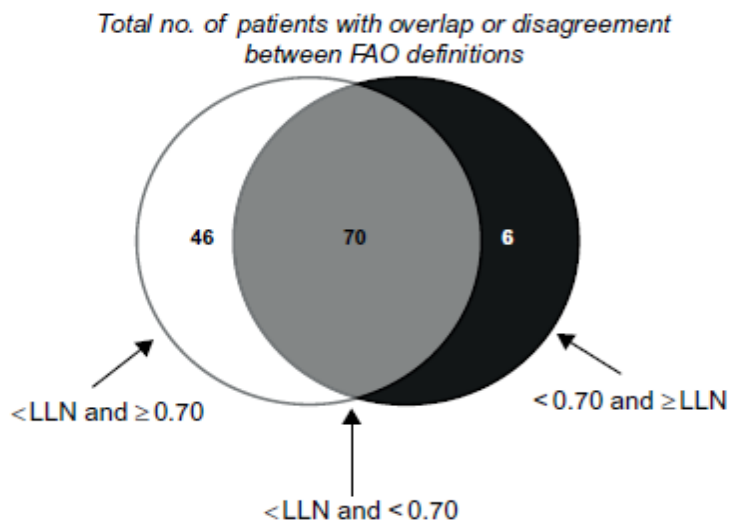

**B**

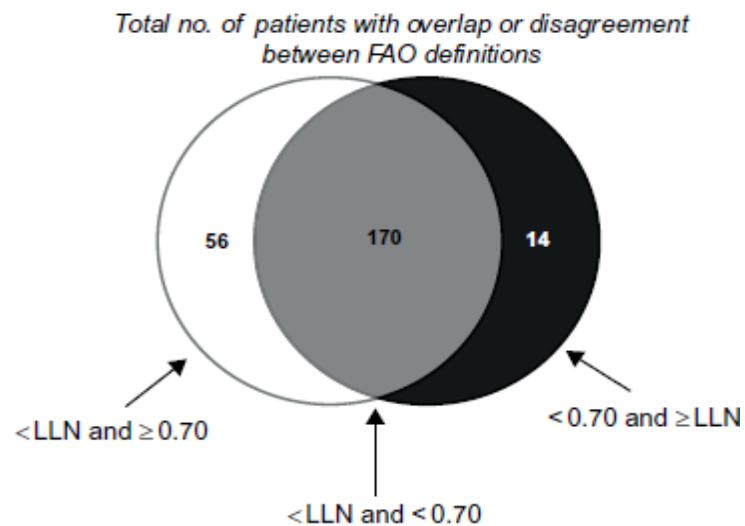

*Influence of age on disagreement between FAO definitions*

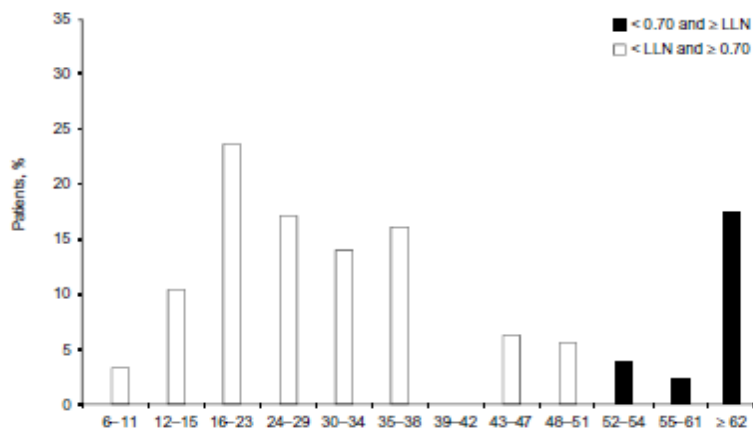

*Influence of age on disagreement between FAO definitions*

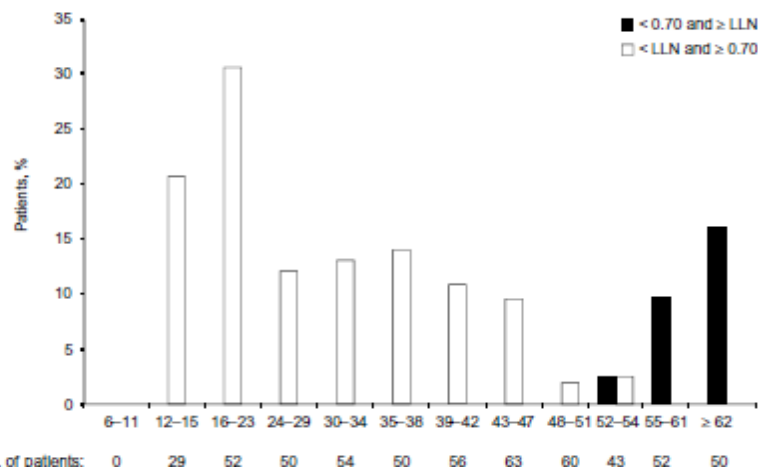

Total no. of patients:

Total no. of patients:

**FIGURE E2.** — Adjusted mean changes from baseline in predose FVC by FAO category (LLN definition) in study I (mild to moderate asthma) and study II (moderate to severe asthma). Note: run-in treatment was placebo for study I and lower dose budesonide for study II (see methods section for run-in and treatment details). BUD/FM = budesonide/formoterol; FAO = fixed airflow obstruction; FVC = forced vital capacity; LLN = lower limit of normal; PBO = placebo.

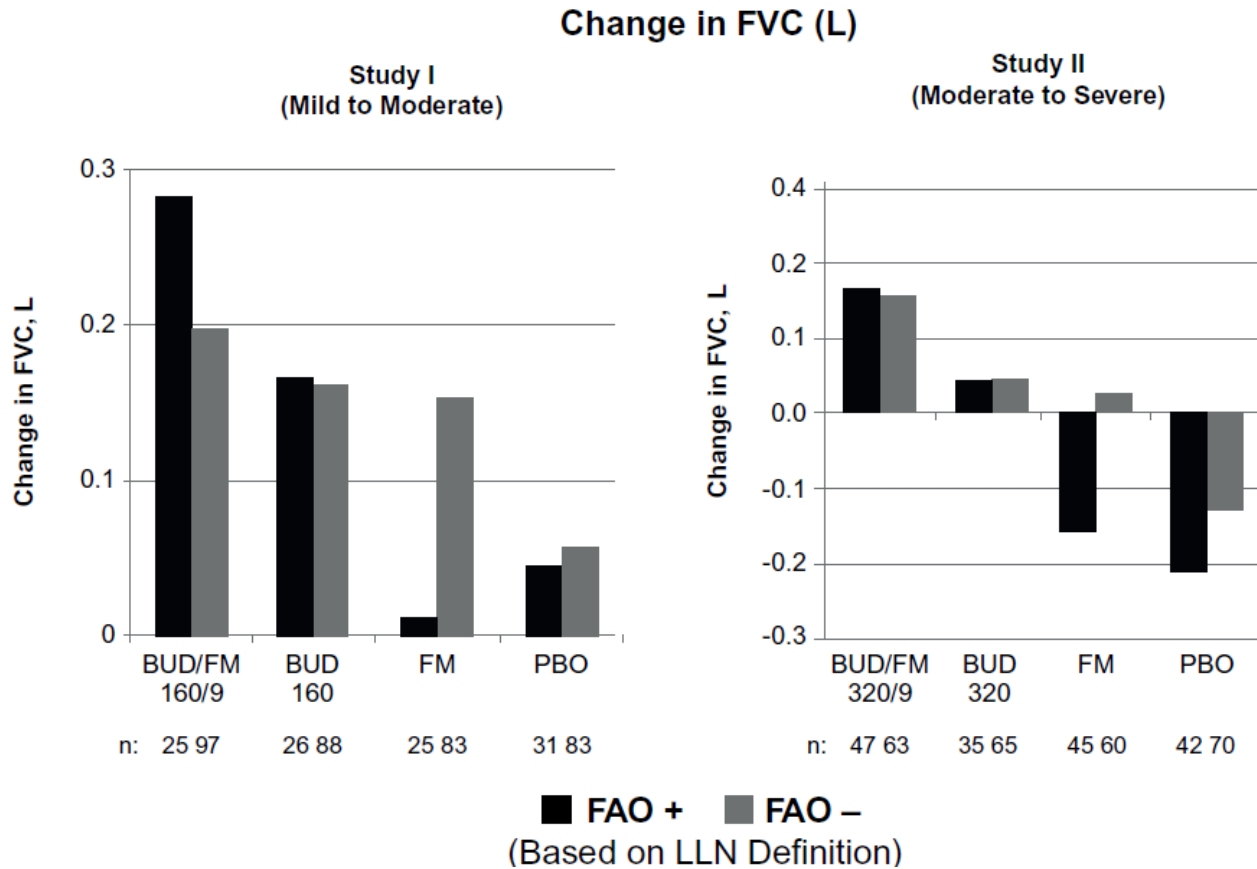

**FIGURE E3.** Adjusted\* mean changes from baseline in predose FEV<sub>1</sub> over time by FAO category (LLN definition) in study I (mild-to-moderate asthma) and study II (moderate-to-severe asthma). The table below the figures reflects the number of patients at each time point. \*Data presented as least-squares mean unless otherwise noted. BUD/FM = budesonide/formoterol; FAO = fixed airflow obstruction; FEV<sub>1</sub> = forced expiratory volume in 1 second; FM = formoterol; LLN = lower limit of normal.

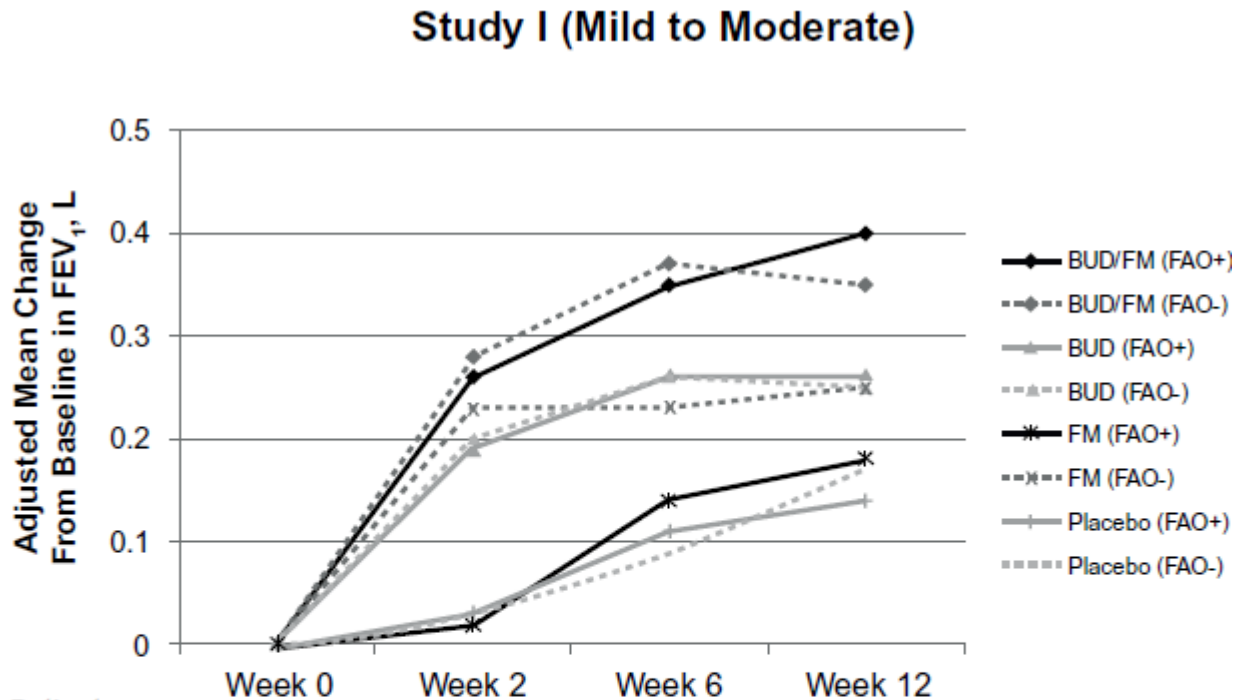

| Patient n:     | Week 0 | Week 2 | Week 6 | Week 12 |
|----------------|--------|--------|--------|---------|
| BUD/FM (FAO+)  | 25     | 25     | 23     | 23      |
| BUD/FM (FAO-)  | 98     | 97     | 91     | 83      |
| BUD (FAO+)     | 28     | 26     | 23     | 23      |
| BUD (FAO-)     | 91     | 88     | 81     | 81      |
| FM (FAO+)      | 29     | 25     | 20     | 19      |
| FM (FAO-)      | 89     | 83     | 71     | 64      |
| Placebo (FAO+) | 34     | 31     | 21     | 16      |
| Placebo (FAO-) | 93     | 83     | 64     | 50      |

### Study II (Moderate to Severe)

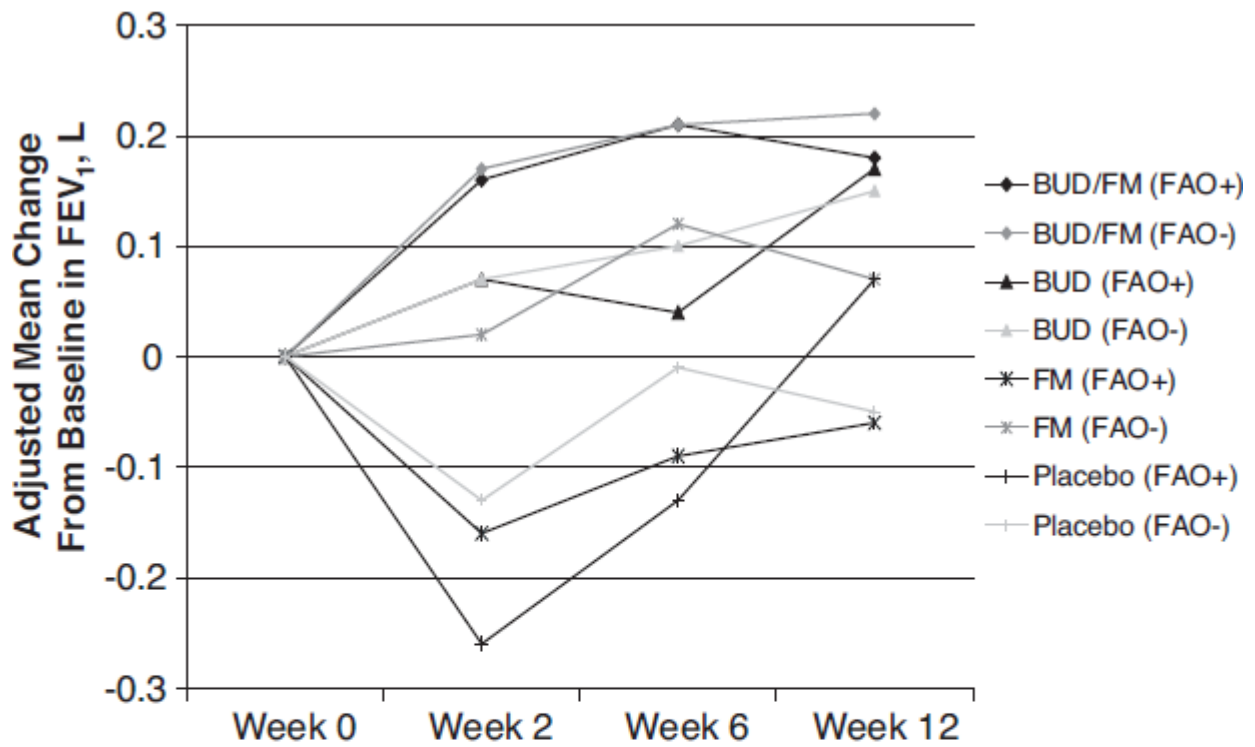

#### Patient n:

|                |    |    |    |    |
|----------------|----|----|----|----|
| BUD/FM (FAO+)  | 50 | 47 | 42 | 39 |
| BUD/FM (FAO-)  | 66 | 63 | 59 | 55 |
| BUD (FAO+)     | 36 | 35 | 29 | 24 |
| BUD (FAO-)     | 65 | 65 | 54 | 48 |
| FM (FAO+)      | 45 | 45 | 29 | 21 |
| FM (FAO-)      | 67 | 60 | 47 | 41 |
| Placebo (FAO+) | 47 | 42 | 21 | 14 |
| Placebo (FAO-) | 74 | 70 | 46 | 40 |
